# Supplementary material for: In situ synthesis of gold nanoparticles embedded in a magnetic nanocomposite of glucosamine/alginate for enhancing recyclable catalysis performance of nitrophenol reduction
Source: Royal Society of Chemistry journal article supplement (doi:10.1039/d4na00979g), 2024-12-17
Supplement: d4na00979g1.pdf [file d4na00979g1.pdf]

***In situ* synthesis of gold nanoparticles embedded in magnetic nanocomposite of glucosamine/alginate for enhancing recyclable catalysis performance of nitrophenol reduction**

Le-Kim-Thuy Nguyen<sup>1,2</sup>, Manh-Huy Do<sup>1,2</sup>, Phuoc-Dat Duong<sup>1,2</sup>, Thi-My-Duyen Tran<sup>1</sup>, Thi-Quynh-Nhu Ngo<sup>1</sup>, Xuan -Thom Nguyen<sup>1</sup>, Van-Dung Le<sup>1,2</sup>, Cao-Hien Nguyen<sup>3</sup>, Radek Fajgar<sup>4</sup> and Thanh-Danh Nguyen<sup>1,2\*</sup>

<sup>1</sup>Institute of Chemical Technology, Vietnam Academy of Science and Technology, 1A TL29 Street, District 12, Ho Chi Minh City 700000, Viet Nam.

<sup>2</sup>Graduate University of Science and Technology, Vietnam Academy of Science and Technology, 18 Hoang Quoc Viet, Cau Giay, Hanoi 11000, Viet Nam.

<sup>3</sup>Department of Chemical Technology, Ho Chi Minh City University of Industry and Trade, Ho Chi Minh City 700000, Viet Nam.

<sup>4</sup>Institute of Chemical Process Fundamentals of the AS CR Prague, Czech Republic.

**\*Corresponding author:** [ntdanh@ict.vast.vn](mailto:ntdanh@ict.vast.vn); [danh5463bd@yahoo.com](mailto:danh5463bd@yahoo.com).

## **Supporting Information**

**Table S1.** Physical parameters of AuNPs calculated from XRD patterns at planes of (3 1 1) for Fe<sub>3</sub>O<sub>4</sub> and (1 1 1) for AuNPs

| No.                                | 2θ deg  | θ Radian | Cos θ (deg) | FWHM degree | β radian | Crystalline size 'D' nm | Interplanar spacing 'd' (Å) | h k l Identified from peak | h <sup>2</sup> +k <sup>2</sup> +l <sup>2</sup> | Lattice const. 'a' from 'd' Å | Cell volume Å <sup>3</sup> |
|------------------------------------|---------|----------|-------------|-------------|----------|-------------------------|-----------------------------|----------------------------|------------------------------------------------|-------------------------------|----------------------------|
| <b>Fe<sub>3</sub>O<sub>4</sub></b> |         |          |             |             |          |                         |                             |                            |                                                |                               |                            |
| <b>0%</b>                          | 35.4172 | 0.3091   | 0.9526      | 0.2662      | 0.0046   | 31.3325                 | 2.5300                      | 3 1 1                      | 11                                             | 8.3911                        | 590.8137                   |
| <b>9%</b>                          | 35.4493 | 0.3094   | 0.9525      | 0.3101      | 0.0054   | 26.8978                 | 2.5260                      | 3 1 1                      | 11                                             | 8.3778                        | 588.0159                   |
| <b>11%</b>                         | 35.4423 | 0.3093   | 0.9525      | 0.2658      | 0.0046   | 31.3806                 | 2.5300                      | 3 1 1                      | 11                                             | 8.3911                        | 590.8137                   |
| <b>13%</b>                         | 35.4474 | 0.3093   | 0.9525      | 0.2668      | 0.0047   | 31.2564                 | 2.5310                      | 3 1 1                      | 11                                             | 8.3944                        | 591.5146                   |
| <b>15%</b>                         | 35.4423 | 0.3093   | 0.9525      | 0.2835      | 0.0049   | 29.4202                 | 2.5230                      | 3 1 1                      | 11                                             | 8.3678                        | 585.9233                   |
| <b>AuNPs</b>                       |         |          |             |             |          |                         |                             |                            |                                                |                               |                            |
| <b>9%</b>                          | 38.1727 | 0.3331   | 0.9450      | 0.4792      | 0.0084   | 17.5411                 | 2.3550                      | 1 1 1                      | 3                                              | 4.0790                        | 67.8664                    |
| <b>11%</b>                         | 38.1612 | 0.3330   | 0.9451      | 0.3845      | 0.0067   | 21.8636                 | 2.3570                      | 1 1 1                      | 3                                              | 4.0824                        | 68.0394                    |
| <b>13%</b>                         | 38.1667 | 0.3331   | 0.9450      | 0.3938      | 0.0069   | 21.3465                 | 2.3560                      | 1 1 1                      | 3                                              | 4.0807                        | 67.9529                    |
| <b>15%</b>                         | 38.2318 | 0.3336   | 0.9449      | 0.4768      | 0.0083   | 17.6341                 | 2.3530                      | 1 1 1                      | 3                                              | 4.0755                        | 67.6936                    |

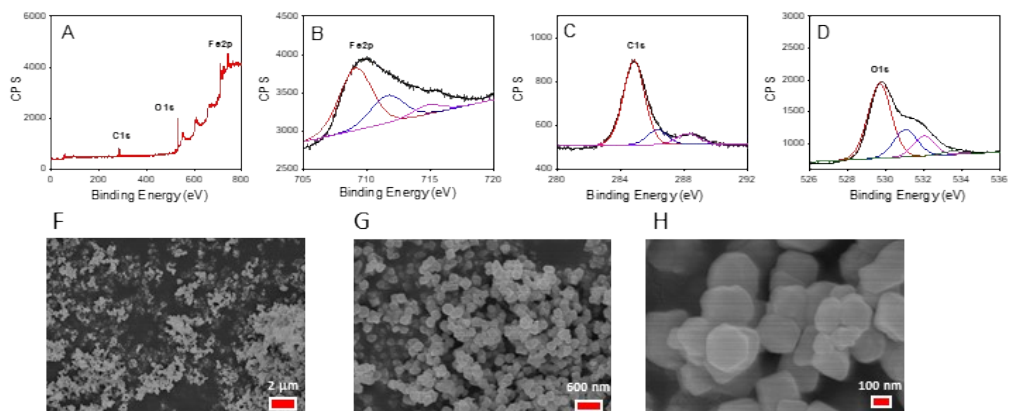

Figure S1. XPS spectrum (A) and High resolution XPS spectra of iron (B), carbon (C) and oxygen (D) in Fe<sub>3</sub>O<sub>4</sub> NPs and SEM images at different magnifications (F – H).

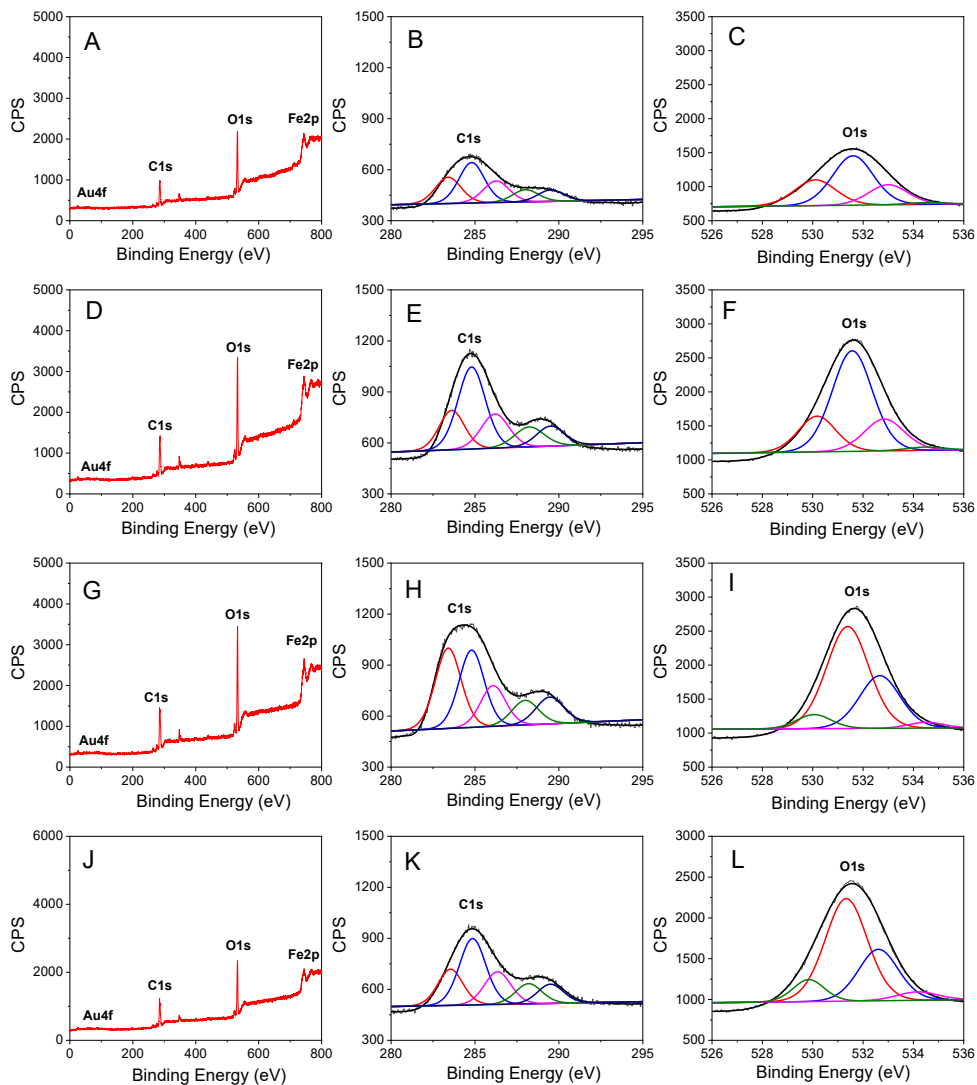

Figure S2. XPS spectra and High resolution XPS spectra of carbon and oxygen in nanocomposite AuNPs/Fe<sub>3</sub>O<sub>4</sub>@GluN/Alg with various content of gold ion: 9% (A-C); 11% (D-F); 13% (G-I) and 15% (J-L).

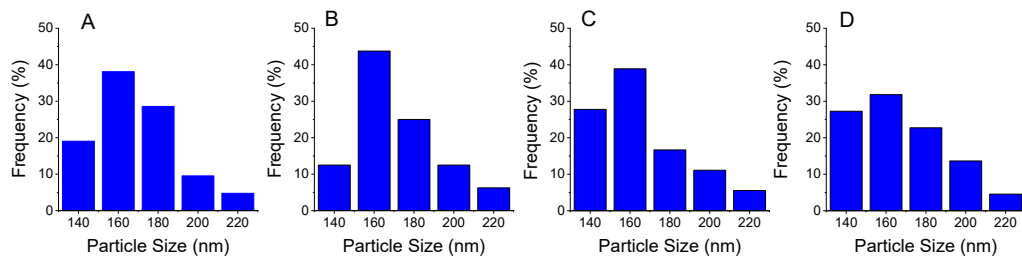

Figure S3. Particle size distribution of Fe<sub>3</sub>O<sub>4</sub> in nanocomposite AuNPs/Fe<sub>3</sub>O<sub>4</sub>@GluN/Alg with various content of gold ion from TEM images: 9% (A), 11% (B), 13% (C) and 15% (D).

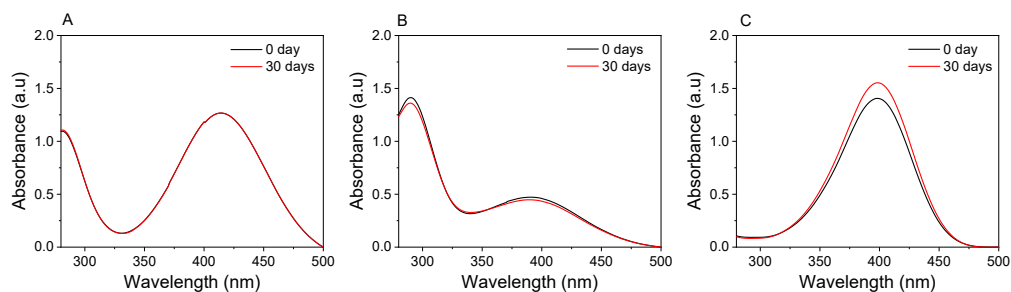

Figure S4. UV-Vis spectra for reduction of 2-nitrophenol (A), 3-nitrophenol (B) and 4-nitrophenol (C) using NaBH<sub>4</sub> without catalyst after 30 days.

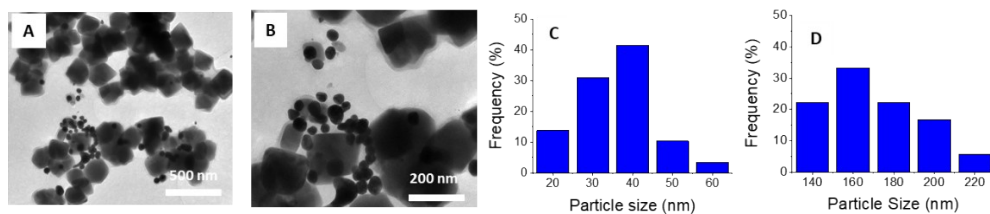

**Figure S5.** TEM images at different magnification (A and B) and size distribution of AuNPs (C) and Fe<sub>3</sub>O<sub>4</sub> (D) of AuNPs/Fe<sub>3</sub>O<sub>4</sub>@GA/Alg – 15% reused after 5 recycle runs.

**Table S2.** Apparent rate constants derived from the pseudo-first-order kinetic experiments conducted for reduction of nitrophenols in the presence of various nanocomposite AuNPs/Fe<sub>3</sub>O<sub>4</sub>@GluN/Alg

| Sub.  | Nanocomposites                                 |                |                                                |                |                                                |                |                                                |                |                                                |                |
|-------|------------------------------------------------|----------------|------------------------------------------------|----------------|------------------------------------------------|----------------|------------------------------------------------|----------------|------------------------------------------------|----------------|
|       | 0%                                             |                | 9 %                                            |                | 11 %                                           |                | 13%                                            |                | 15%                                            |                |
|       | $k_{app} \times 10^{-3}$<br>(s <sup>-1</sup> ) | R <sup>2</sup> | $k_{app} \times 10^{-3}$<br>(s <sup>-1</sup> ) | R <sup>2</sup> | $k_{app} \times 10^{-3}$<br>(s <sup>-1</sup> ) | R <sup>2</sup> | $k_{app} \times 10^{-3}$<br>(s <sup>-1</sup> ) | R <sup>2</sup> | $k_{app} \times 10^{-3}$<br>(s <sup>-1</sup> ) | R <sup>2</sup> |
| 2-NiP | 0.13                                           | 0.95           | 1.16                                           | 0.94           | 1.22                                           | 0.91           | 1.67                                           | 0.92           | 2.05                                           | 0.92           |
| 3-NiP | 0.11                                           | 0.97           | 1.35                                           | 0.93           | 1.57                                           | 0.95           | 2.02                                           | 0.97           | 2.01                                           | 0.93           |
| 4-NiP | 0.05                                           | 0.90           | 1.78                                           | 0.95           | 1.77                                           | 0.98           | 2.02                                           | 0.98           | 2.29                                           | 0.99           |
